# Supplementary material for: Impaired Succinate Oxidation Prevents Growth and Influences Drug Susceptibility in Mycobacterium tuberculosis
Source: PubMed Central journal article supplement (PMC9426501; doi:10.1128/mbio.01672-22), 2022-07-20
Supplement: mbio.01672-22-s0005.pdf [file mbio.01672-22-s0005.pdf]

**Table S1: sgRNA targeting *sdhA1*, *sdhA2*, *frdA* and *cydB* in *M. tuberculosis***

| Target  | sgRNA name | PAM sequence (5'-3' direction on the template strand) | PAM score <sup>a</sup> | Targeted sequence in target gene (5'-3' direction on the non-template strand) |
|---------|------------|-------------------------------------------------------|------------------------|-------------------------------------------------------------------------------|
| Rv1552  | frdA_a     | ACAGAAT                                               | 2                      | GCACCGGCGGATGCGGGCGGGT                                                        |
| Rv1552  | frdA_b     | TTGGAAA                                               | 6                      | GGTGTACCCGATGCGCAGCC                                                          |
| Rv1552  | frdA_c     | GCAGGAG                                               | 8                      | ACACGTTGTTTCAACGGCTGC                                                         |
| Rv0248c | sdhA1_a    | CCAGAAT                                               | 2                      | TCACTGAGGGTGTTCGCGGC                                                          |
| Rv0248c | sdhA1_b    | GTAGGAG                                               | 5                      | GACGTAGTCGTGATCGGTGC                                                          |
| Rv0248c | sdhA1_c    | TCAGGAA                                               | 14                     | ACAAGTGGCGTATGGCCGAGC                                                         |
| Rv3318  | sdhA2_a    | GCAGAAT                                               | 2                      | AGACGCTGTATCAGAAGTGC                                                          |
| Rv3318  | sdhA2_b    | GAAGAAC                                               | 5                      | AACGAGTTTTACGCGCTGGAT                                                         |
| Rv3318  | sdhA2_c    | AGGGAAG                                               | 4                      | TGGAGGACATGGAGTTTCAC                                                          |
| Rv1622c | cydB_a     | GAAGAAA                                               | 3                      | ATCCTAGAAGGGTTCGACTT                                                          |

<sup>a</sup>: PAM score as ranked out of 15 possible permissible sequences (46)
