# Supplementary material for: Impaired Succinate Oxidation Prevents Growth and Influences Drug Susceptibility in Mycobacterium tuberculosis
Source: PubMed Central journal article supplement (PMC9426501; doi:10.1128/mbio.01672-22), 2022-07-20
Supplement: mbio.01672-22-s0006.pdf [file mbio.01672-22-s0006.pdf]

**Table S2: Oligos used in this study**

| Name                                                                                            | Sequence                                          | Description                                   |
|-------------------------------------------------------------------------------------------------|---------------------------------------------------|-----------------------------------------------|
| <b>CRISPRi cloning oligos</b>                                                                   |                                                   |                                               |
| FrdA_TB_Fcs                                                                                     | GGGAACCCGCCCCGCATCCGCCGGTGC                       | Fwd cloning oligo for CRISPRi                 |
| FrdA_TB_Rcs                                                                                     | AAACGCACCGGCGGATGCGGGCGGGT                        | Rev cloning oligo for CRISPRi                 |
| FrdAb_TB_Fcs                                                                                    | GGGAGGCTGCGCATCGGGTACACC                          | Fwd cloning oligo for CRISPRi                 |
| FrdAb_TB_Rcs                                                                                    | AAACGGTGTACCCGATGCGCAGCC                          | Rev cloning oligo for CRISPRi                 |
| FrdAc_TB_Fcs                                                                                    | GGGAGCAGCCGTTGAAACAACGTGT                         | Fwd cloning oligo for CRISPRi                 |
| FrdAc_TB_Rcs                                                                                    | AAACACACGTTGTTTCAACGGCTGC                         | Rev cloning oligo for CRISPRi                 |
| SdhA1_TB_Fcs                                                                                    | GGGAGCCGCGAACACCCTCAGTGA                          | Fwd cloning oligo for CRISPRi                 |
| SdhA1_TB_Rcs                                                                                    | AAACTCACTGAGGGTGTTCGCGGC                          | Rev cloning oligo for CRISPRi                 |
| SdhA1b_TB_Fcs                                                                                   | GGGAGCACCGATCACGACTACGTC                          | Fwd cloning oligo for CRISPRi                 |
| SdhA1b_TB_Rcs                                                                                   | AAACGACGTAGTCGTGATCGGTGC                          | Rev cloning oligo for CRISPRi                 |
| SdhA1c_TB_Fcs                                                                                   | GGGAGCTCGCCATACGCCAGTTGT                          | Fwd cloning oligo for CRISPRi                 |
| SdhA1c_TB_Rcs                                                                                   | AAACACAACCTGGCGTATGGCCGAGC                        | Rev cloning oligo for CRISPRi                 |
| SdhA2_TB_Fcs                                                                                    | GGGAGCAGTTCTGATACAGCGTCT                          | Fwd cloning oligo for CRISPRi                 |
| SdhA2_TB_Rcs                                                                                    | AAACAGACGCTGTATCAGAACTGC                          | Rev cloning oligo for CRISPRi                 |
| SdhA2b_TB_Fcs                                                                                   | GGGAATCCAGCGCGTAAACTCGTT                          | Fwd cloning oligo for CRISPRi                 |
| SdhA2b_TB_Rcs                                                                                   | AAACAACGAGTTTTACGCGCTGGAT                         | Rev cloning oligo for CRISPRi                 |
| SdhA2c_TB_Fcs                                                                                   | GGGAGTGAAACTCCATGTCCTCCA                          | Fwd cloning oligo for CRISPRi                 |
| SdhA2c_TB_Rcs                                                                                   | AAACTGGAGGACATGGAGTTTCAC                          | Rev cloning oligo for CRISPRi                 |
| cydB_a_TB_Fcs                                                                                   | GGGAAAGTCGAACCCTTCTAGGAT                          | Fwd cloning oligo for CRISPRi                 |
| cydB_a_TB_Rcs                                                                                   | AAACATCCTAGAAGGGTTCTGACTT                         | Rev cloning oligo for CRISPRi                 |
| <b>qPCR oligos</b>                                                                              |                                                   |                                               |
| MMO33                                                                                           | AGCCATCGAGCTGGGATTTT                              | SdhA2_TB Fwd qPCR primer                      |
| MMO32                                                                                           | CCTTGTAGGCCATGGTGTGT                              | SdhA2_TB Rev qPCR primer                      |
| MMO149                                                                                          | TACGCGCTGCATATGGACTT                              | SdhA1_TB Fwd qPCR primer                      |
| MMO150                                                                                          | ACGAGTACGTTGTGGTAGCG                              | SdhA1_TB Rev qPCR primer                      |
| MMO153                                                                                          | GACGACGAGCATTCTTGGC                               | FrdA_TB Fwd qPCR primer                       |
| MMO154                                                                                          | CCAGCGAGTGATAGTGACCG                              | FrdA_TB Rev qPCR primer                       |
| MMO173                                                                                          | GAGGAGATCGCTGAACCCAC                              | SigA_TB Fwd qPCR primer                       |
| MMO174                                                                                          | CTGTTTGAGGTAGGCGCGAA                              | SigA_TB Rev qPCR primer                       |
| <b>Multiplex cloning oligos (Red denotes the sap1 cut site, blue is the generated overhang)</b> |                                                   |                                               |
| MMO120                                                                                          | AATATGCTCTTCAGGATCTGACCAGGGAA<br>AATAGCC          | Fwd primer for amplification of sgRNA modules |
| MMO121                                                                                          | TTTATGCTCTTCACTGAAAAAAAAAACACC<br>CTGCCATAAAATGAC | Rev primer for amplification of sgRNA modules |
| MMO122                                                                                          | AATATGCTCTTCAGCTTCTGACCAGGGAA<br>AATAGCC          | Fwd primer for amplification of sgRNA modules |

---

MMO123

TTTATGCTTTCAGCAAAAAAAAAACACC  
CTGCCATAAAATGAC

Rev primer for amplification of  
sgRNA modules

---
