# Supplementary material for: Impaired Succinate Oxidation Prevents Growth and Influences Drug Susceptibility in Mycobacterium tuberculosis
Source: PubMed Central journal article supplement (PMC9426501; doi:10.1128/mbio.01672-22), 2022-07-20
Supplement: mbio.01672-22-s0007.pdf [file mbio.01672-22-s0007.pdf]

**Table S3: Plasmids used in this study**

| Name                         | Description                                                                                         | Plasmid Backbone | Reference  |
|------------------------------|-----------------------------------------------------------------------------------------------------|------------------|------------|
| pJLR965                      | CRISPRi cloning vector for <i>M. tuberculosis</i> - vector expressing dCas9 and non-targeting sgRNA |                  | (46)       |
| <b>Single sgRNA plasmids</b> |                                                                                                     |                  |            |
| pCi7                         | CRISPRi vector expressing dCas9 + sgRNA targeting <i>mmpL3</i>                                      | pJLR965          | (48)       |
| pCi5                         | CRISPRi vector expressing dCas9 + sgRNA ( <i>frdA_a</i> ) targeting <i>frdA</i>                     | pJLR965          | This study |
| pCi8                         | CRISPRi vector expressing dCas9 + sgRNA ( <i>sdhA1_a</i> ) targeting <i>sdhA1</i>                   | pJLR965          | (42)       |
| pCi9                         | CRISPRi vector expressing dCas9 + sgRNA ( <i>sdhA2_a</i> ) targeting <i>sdhA2</i>                   | pJLR965          | (42)       |
| pCi23                        | CRISPRi vector expressing dCas9 + sgRNA ( <i>frdA_b</i> ) targeting <i>frdA</i>                     | pJLR965          | (42)       |
| pCi24                        | CRISPRi vector expressing dCas9 + sgRNA ( <i>frdA_c</i> ) targeting <i>frdA</i>                     | pJLR965          | (42)       |
| pCi25                        | CRISPRi vector expressing dCas9 + sgRNA ( <i>sdhA1_b</i> ) targeting <i>sdhA1</i>                   | pJLR965          | (42)       |
| pCi26                        | CRISPRi vector expressing dCas9 + sgRNA ( <i>sdhA1_c</i> ) targeting <i>sdhA1</i>                   | pJLR965          | This study |
| pCi27                        | CRISPRi vector expressing dCas9 + sgRNA ( <i>sdhA2_b</i> ) targeting <i>sdhA2</i>                   | pJLR965          | (42)       |
| pCi28                        | CRISPRi vector expressing dCas9 + sgRNA ( <i>sdhA2_c</i> ) targeting <i>sdhA2</i>                   | pJLR965          | This study |
| pCi95                        | CRISPRi vector expressing dCas9 + sgRNA ( <i>cydB</i> ) targeting <i>cydB</i>                       | pJLR965          | (42)       |
| <b>Multiplexed plasmids</b>  |                                                                                                     |                  |            |
| pCiMX15                      | CRISPRi vector expressing dCas9 + sgRNAs ( <i>sdhA1_a</i> and <i>sdhA2_a</i> )                      | pCi8             | This study |
| pCiMX22                      | CRISPRi vector expressing dCas9 + sgRNAs ( <i>frdA_b</i> and <i>sdhA1_a</i> )                       | pCi23            | This study |
| pCiMX23                      | CRISPRi vector expressing dCas9 + sgRNAs ( <i>frdA_b</i> and <i>sdhA2_a</i> )                       | pCi23            | This study |
| pCiMX24                      | CRISPRi vector expressing dCas9 + sgRNAs ( <i>frdA_b</i> , <i>sdhA1_a</i> and <i>sdhA2_a</i> )      | pCi23            | This study |
| pCiMX30                      | CRISPRi vector expressing dCas9 + sgRNAs ( <i>sdhA1_b</i> and <i>sdhA2_b</i> )                      | pCi25            | This study |
| pCiMX31                      | CRISPRi vector expressing dCas9 + sgRNAs ( <i>frdA_b</i> , <i>sdhA1_b</i> and <i>sdhA2_b</i> )      | pCi23            | This study |
| pCiMX34                      | CRISPRi vector expressing dCas9 + sgRNAs ( <i>sdhA1_c</i> and <i>sdhA2_c</i> )                      | pCi26            | This study |
| pCiMX35                      | CRISPRi vector expressing dCas9 + sgRNAs ( <i>frdA_c</i> , <i>sdhA1_c</i> and <i>sdhA2_c</i> )      | pCi24            | This study |
