# Supplementary material for: Impaired Succinate Oxidation Prevents Growth and Influences Drug Susceptibility in Mycobacterium tuberculosis
Source: PubMed Central journal article supplement (PMC9426501; doi:10.1128/mbio.01672-22), 2022-07-20
Supplement: mbio.01672-22-s0008.pdf [file mbio.01672-22-s0008.pdf]

**Table S4: Amplification of target sgRNA for multiplexed cloning**

| <b>Component</b>                 | <b>50 <math>\mu</math>l RxN (<math>\mu</math>l)</b> |             |               |
|----------------------------------|-----------------------------------------------------|-------------|---------------|
| H <sub>2</sub> O                 | 31                                                  |             |               |
| 5x Phusion GC Buffer             | 10                                                  |             |               |
| 10 mM dNTPs                      | 1                                                   |             |               |
| Fwd Primer (10 $\mu$ M stock)    | 2.5                                                 |             |               |
| Rev Primer (10 $\mu$ M stock)    | 2.5                                                 |             |               |
| pCi plasmid with target sgRNA    | 1 $\mu$ l                                           |             |               |
| DMSO                             | 1.5                                                 |             |               |
| Phusion Poln                     | 0.5                                                 |             |               |
| Total                            | 50                                                  |             |               |
| <b>Thermocycler instructions</b> |                                                     |             |               |
| <b>Step</b>                      | <b>Temp</b>                                         | <b>Time</b> | <b>Cycles</b> |
| Initial Denaturation             | 98 °C                                               | 30 sec      | 1             |
| Denaturation                     | 98 °C                                               | 10 sec      |               |
| Annealing                        | 60 °C                                               | 30 sec      | 35            |
| Extension                        | 72 °C                                               | 1 min       |               |
| Final Extension                  | 72 °C                                               | 10 min      | 1             |
| Hold                             | 4 °C                                                | hold        |               |
