# Supplementary material for: Impaired Succinate Oxidation Prevents Growth and Influences Drug Susceptibility in Mycobacterium tuberculosis
Source: PubMed Central journal article supplement (PMC9426501; doi:10.1128/mbio.01672-22), 2022-07-20
Supplement: mbio.01672-22-s0009.pdf [file mbio.01672-22-s0009.pdf]

**Table S5: Multiplex golden gate cloning**

| <b>Component</b>          | <b>Volume (μl)</b>       |           |
|---------------------------|--------------------------|-----------|
| 10× T4 Ligase Buffer      | 1                        |           |
| pCi uncut (20 ng/μL)      | 1.25                     |           |
| Cloned and purified sgRNA | 2.5                      |           |
| Sap1 (10,000u/ml)         | 0.5                      |           |
| T4 DNA Ligase             | 0.5                      |           |
| mQ                        | Up to 10 μl total volume |           |
| <b>Temperature (°C)</b>   | <b>Duration</b>          |           |
| 37 (digestion)            | 5 min                    | 30 cycles |
| 16 (ligation)             | 5 min                    |           |
| 4                         | Forever                  | 1         |
